# Supplementary material
Source: Springer Nature journal article supplement (https://www.springermedizin.de/resource/supplementary/13012_2011_442_MOESM5_ESM.pdf/9630150)
Supplement: MOESM5 [file 9630150]

| <b>Strategy</b>        | <b>Patient</b><br>Make better use of self care support                                                                                                                                                      | <b>Professional</b><br>Provide better self care support                                                                                                                                                                         | <b>Systems</b><br>Improve access to self care support                                                                                                                                                                                                                                                     |
|------------------------|-------------------------------------------------------------------------------------------------------------------------------------------------------------------------------------------------------------|---------------------------------------------------------------------------------------------------------------------------------------------------------------------------------------------------------------------------------|-----------------------------------------------------------------------------------------------------------------------------------------------------------------------------------------------------------------------------------------------------------------------------------------------------------|
| <b>Specific method</b> | <p>Find best option for self care support based on:</p> <ul style="list-style-type: none"> <li>• Current ability and needs</li> <li>• Personal goals and priorities</li> <li>• A negotiated plan</li> </ul> | <p>Training in</p> <ul style="list-style-type: none"> <li>• Assessing patient's skills, beliefs and values</li> <li>• Shared decision making</li> <li>• Helping patients get access to appropriate self care support</li> </ul> | <ul style="list-style-type: none"> <li>• Access to training for staff</li> <li>• Access to computer support tools</li> <li>• Regular update of local support options</li> <li>• Ensure patients have easy access to support options</li> <li>• Awareness of barriers to access in the practice</li> </ul> |
| <b>Tools</b>           | <ul style="list-style-type: none"> <li>• PRISMS</li> <li>• Menu of options</li> <li>• Management plan</li> </ul>                                                                                            | <ul style="list-style-type: none"> <li>• Computer template</li> <li>• PRISMS</li> <li>• Explanatory model</li> <li>• Menu of options</li> <li>• Management plan</li> </ul>                                                      | <ul style="list-style-type: none"> <li>• Computer template for support tools</li> <li>• Menu of options</li> <li>• Self care support directory of local groups and organisations</li> </ul>                                                                                                               |
